# Supplementary material for: Tuning the catalytic activity of colloidal noble metal nanocrystals by using differently charged surfactants
Source: Royal Society of Chemistry journal article supplement (doi:10.1039/c8nr00327k), 2018-01-01
Supplement: c8nr00327k1.pdf [file c8nr00327k1.pdf]

## Supplementary Information

# Tuning the Catalytic Activity of Colloidal Noble Metal Nanocrystals by Use of Differently Charged Surfactants

*Jinhui Hu,<sup>a</sup> Hua Mi,<sup>a</sup> Nan Wang,<sup>a</sup> Houyu Zhu,<sup>b</sup> Wenyue Guo,<sup>b</sup> Shouren Zhang,<sup>c</sup> Feng Shi,<sup>a</sup>  
Zhibin Lei,<sup>a</sup> Zong-Huai Liu,<sup>a</sup> Ruibin Jiang<sup>\*a</sup>*

<sup>a</sup>Key Laboratory of Applied Surface and Colloid Chemistry, National Ministry of Education,  
Shaanxi Key Laboratory for Advanced Energy Devices, Shaanxi Engineering Lab for Advanced  
Energy Technology, School of Materials Science and Engineering, Shaanxi Normal University,  
Xi'an, 710119, China

<sup>b</sup>College of Science, China University of Petroleum, Qingdao, Shandong 266580, China

<sup>c</sup>Henan Provincial Key-Laboratory of Nano-composite and Applications, Huanghe Science and  
Technology College, Zhengzhou, Henan 450063, China

\*Corresponding author: [rjiang@snnu.edu.cn](mailto:rjiang@snnu.edu.cn)

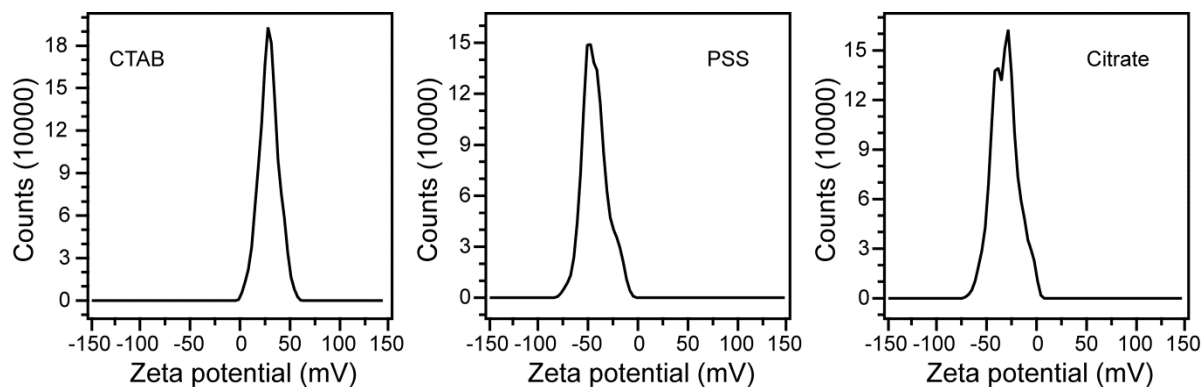

**Fig. S1** Zeta potential of Au nanospheres capped with CTAB, PSS and citrate.

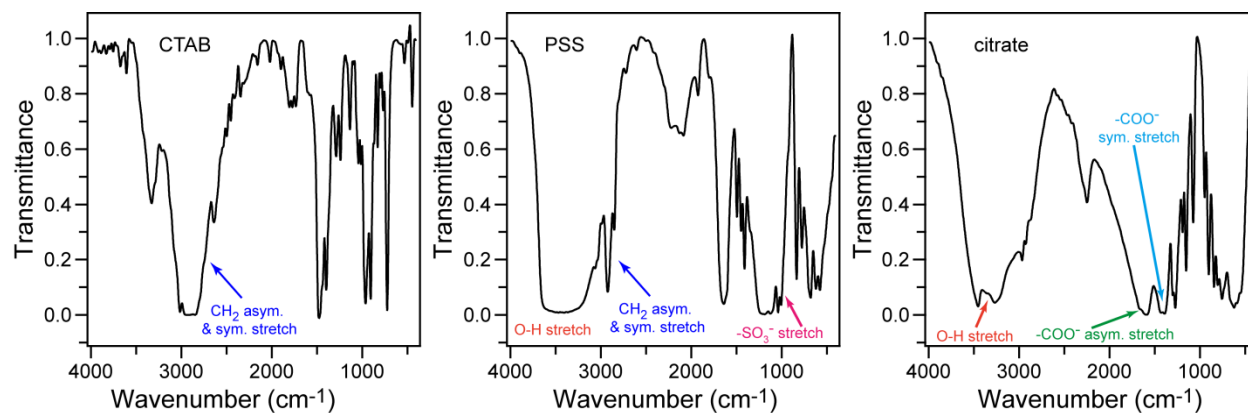

**Fig. S2** FTIR spectra of free CTAB, PSS and citrate.

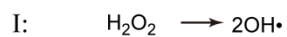

II:

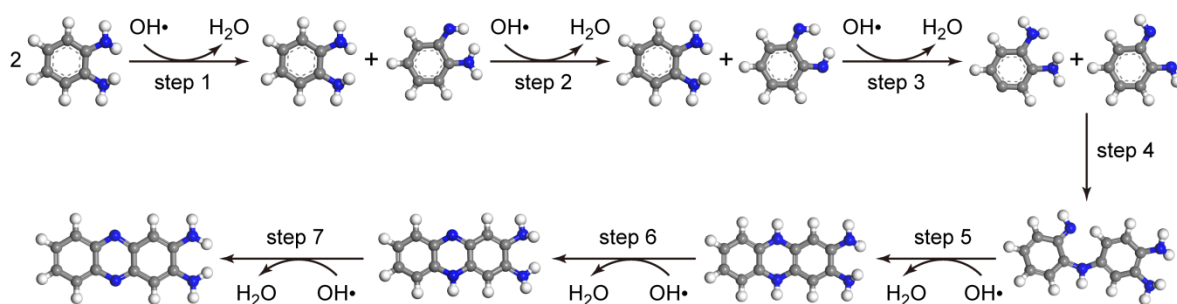

**Fig. S3** Reaction process of the oxidation of OPDA to DAP by  $\text{H}_2\text{O}_2$ . The oxidation process can be divided into two large steps. The first one is the decomposition of  $\text{H}_2\text{O}_2$  into  $\text{OH}$  radicals. The second one is the oxidation of OPDA by  $\text{OH}$  radical into DAP, which contains two reaction pathways.

| steps | initial state                                                                       | transition state                                                                    | final state                                                                          | $E_a$   | $\Delta E$ |
|-------|-------------------------------------------------------------------------------------|-------------------------------------------------------------------------------------|--------------------------------------------------------------------------------------|---------|------------|
| 1     | 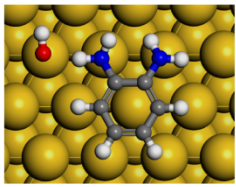   |    |    | 0.24 eV | -0.06 eV   |
| 2     |    |    |    | 0.29 eV | -0.03 eV   |
| 3     |    |    |    | 0.82 eV | 0.31 eV    |
| 4     |   |   |   | 0.75 eV | -1.88 eV   |
| 5     |  |  |  | 0.71 eV | 0.61 eV    |
| 6     |  |  |  | 0.32 eV | 0.08 eV    |
| 7     |  |  |  | 0.28 eV | 0.12 eV    |


 Au
  C
  N
  O
  H

**Fig. S4** Structures and energy barriers and reaction energies of elementary steps in the second large step. The transition states searches were performed with complete LST/QST method implemented in Dmol.

| neutral                                                                           | positive                                                                          | negative                                                                           |
|-----------------------------------------------------------------------------------|-----------------------------------------------------------------------------------|------------------------------------------------------------------------------------|
| 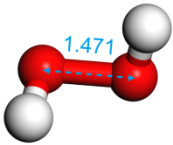 |  |  |

**Fig. S5** Lengths of the scission bonds of  $\text{H}_2\text{O}_2$  with different charges. Neutral charge means that the species are in neutral state. Positive and negative charge means that the species loss or get one electron. The numbers in the figures are bond lengths with unit of ångström. The red and white spheres stand for oxygen and hydrogen atoms, respectively.

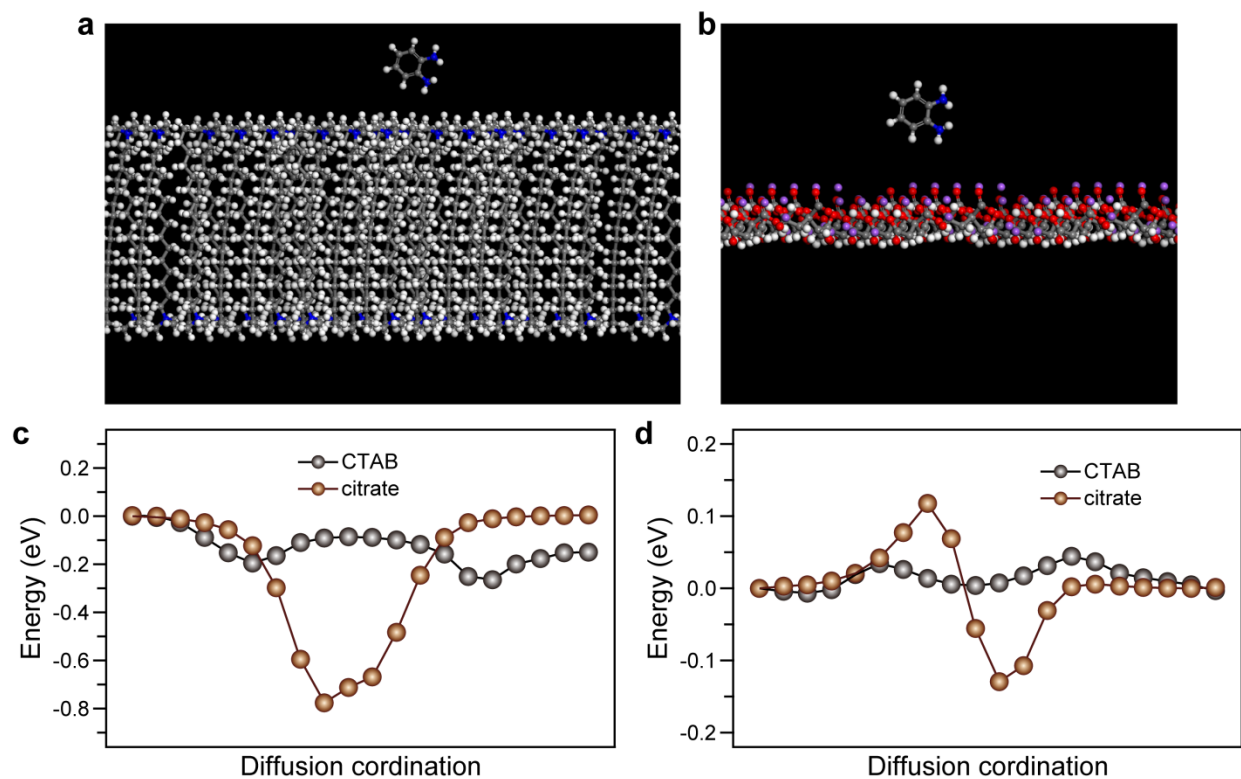

**Fig. S6** (a) Model employed to study the diffusion of OPDA through CTAB layer. (b) Model employed to study the diffusion of OPDA through citrate layer. The CTAB and citrate layers used in the study of  $\text{H}_2\text{O}_2$  diffusion are the same as those used in the study of OPDA diffusion. (c) Energy changes for OPDA diffused from top to the bottom of the CTAB and citrate layers. (d) Energy changes for  $\text{H}_2\text{O}_2$  diffused from top to the bottom of the CTAB and citrate layers. The energy is calculated relative to that of the OPDA/ $\text{H}_2\text{O}_2$  located above the CTAB/citrate layer. The calculation employed periodic slab. During the calculation, the CTAB and citrate molecules can move but are not relaxed. The energy barriers for OPDA and  $\text{H}_2\text{O}_2$  diffusing through CTAB layer are smaller than 0.2 eV, indicating that the steric hindered effect of CTAB played on reactants is negligible.

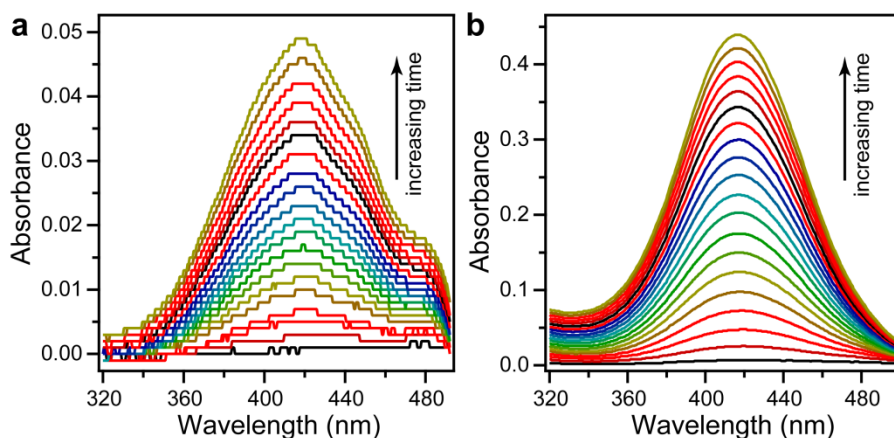

**Fig. S7** Time-dependent absorption spectra of the reaction solution with the Au nanorod samples capped by CTAB (a) and citrate (b). Since the absorption of reaction solution catalyzed by CTAB-capped Au nanorods is extremely weak, the measured absorption spectra are not smooth.

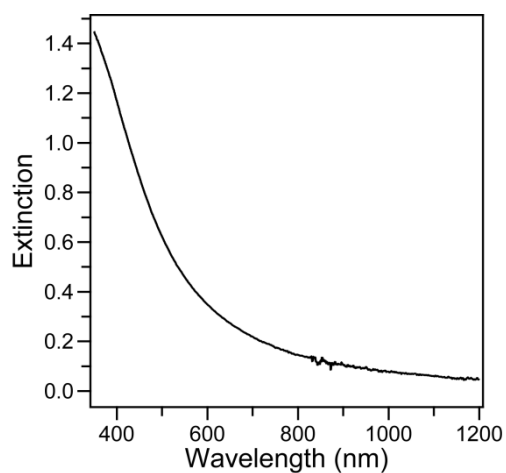

**Fig. S8** Extinction spectrum of the Pd nanocubes.

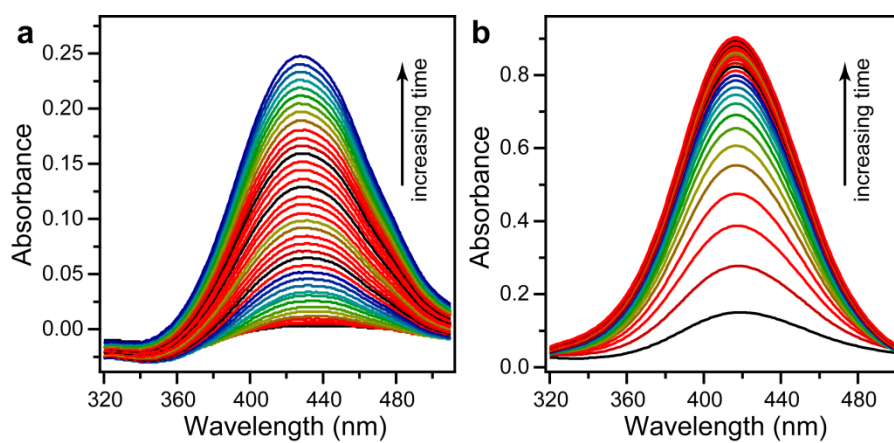

**Fig. S9** Time-dependent absorption spectra of the reaction solution with the Pd nanocube samples capped by CTAB (a) and citrate (b).

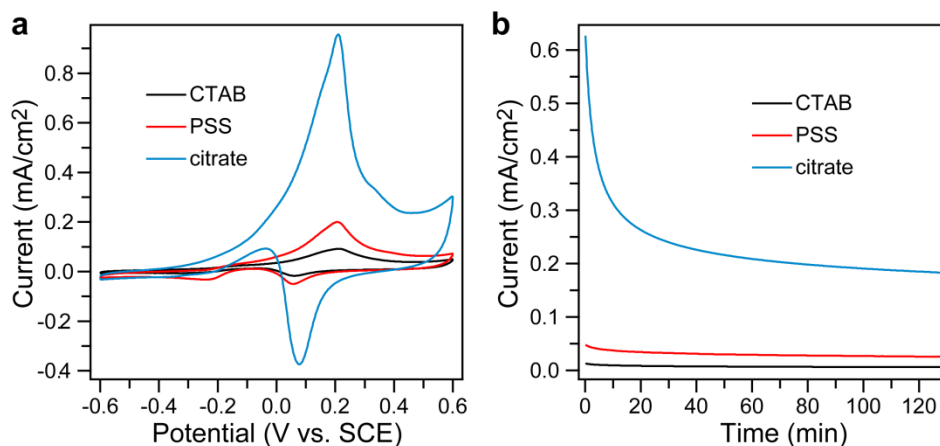

**Fig. S10** Electrocatalytic oxidation of methanol by Au nanospheres capped with different surfactants. a) Cyclic voltammograms. b) Chronoamperograms at 0.21 V vs. SCE. The standard three-electrode configuration was employed. A glassy carbon electrode deposited with Au nanospheres capped with different surfactants was used as the working electrode, a saturated calomel electrode as the reference electrode and the counter electrode was a Pt wire. A KOH (0.5 M) with methanol (2 M) solution was used as the electrolyte. The working electrode was prepared by drop-casting 5  $\mu\text{L}$  of the Au nanosphere suspension with the Au mass concentration of  $6.2 \text{ mg mL}^{-1}$  on the glassy carbon electrode surface. The electrode was dried in air for 1 h at room temperature before use. The citrate-capped Au nanospheres exhibit high catalytic activity for electrooxidation of methanol than CTAB- and PSS-capped Au nanospheres. Moreover, the citrate-capped Au nanospheres also show better durability for electrooxidation of methanol than the CTAB- and PSS-capped Au nanospheres.
